# Supplementary material
Source: PubMed Central journal article supplement (PMC4254367)
Supplement: NIHMS640309-supplement-Appendix.pdf [file NIHMS640309-supplement-Appendix.pdf]

| Subject | Diagnosis                   | GA | SB Length (cm) | Comments                                                 |
|---------|-----------------------------|----|----------------|----------------------------------------------------------|
| FO 1    | Atresia, Volvulus           | 34 | 35             | Weaned from PN after FO                                  |
| FO 2    | Long-segment atresia        | 39 | 8              | At the end of follow-up, remained on PN/SO               |
| FO 3    | Gastroschisis, Atresia, NEC | 34 | 45             | Received a transplant during FO intervention             |
| FO 4    | Gastroschisis               | 36 | 23             | At the end of follow-up, remained on PN/SO               |
| FO 5    | Gastroschisis               | 33 | 0              | Received a transplant during follow-up                   |
| FO 6    | NEC                         | 25 | 51             | Expired during FO intervention                           |
| FO 7    | NEC                         | 28 | 16             | At the end of follow-up, remained on PN/SO               |
| FO 8    | Tufting Enteropathy         | 36 | --             | Not available for follow-up                              |
| FO 9    | MMHIS                       | 37 | --             | Expired during FO intervention                           |
| FO 10   | Gastroschisis               | 35 | --             | Weaned from PN during FO intervention                    |
| SO 1    | Atresia                     | 34 | 55             |                                                          |
| SO 2    | Gastroschisis               | 36 | --             | Expired during study                                     |
| SO 3    | Gastroschisis, NEC          | 36 | 48             |                                                          |
| SO 4    | Gastroschisis, atresia      | 34 | 27             |                                                          |
| SO 5    | NEC                         | 25 | --             | Weaned from PN during the study                          |
| SO 6    | Volvulus                    | 34 | 28             | Received a transplant during study                       |
| SO 7    | Multiple atresias           | 37 | 0              |                                                          |
| SO 8    | NEC                         | 25 | --             | No bowel length recorded, but most likely NEC totalis    |
| SO 9    | Gastroschisis, volvulus     | 36 | 47             |                                                          |
| SO 10   | Multiple atresias           | 33 | 12             |                                                          |
| SO 11   | NEC, atresia                | 32 | --             | 15 cm of bowel resected, weaned from PN during study     |
| SO 12   | Volvulus                    | 35 | 35             |                                                          |
| SO 13   | Atresia, Volvulus           | 37 | --             | 4 cm of bowel resected, weaned from PN during the study  |
| SO 14   | NEC                         | 34 | --             | 15 cm of bowel resected, weaned from PN during the study |
| SO 15   | Gastroschisis               | 39 | --             | Expired during study                                     |
| SO 16   | Gastroschisis, Atresia      | 34 | 18             |                                                          |
| SO 17   | NEC                         | 27 | 25             |                                                          |
| SO 18   | Gastroschisis, volvulus     | 36 | 10             |                                                          |

|       |               |    |    |                                        |
|-------|---------------|----|----|----------------------------------------|
| SO 19 | Volvulus      | 36 | 5  | Received a transplant during the study |
| SO 20 | Gastroschisis | 36 | 44 |                                        |
